# Supplementary material for: Insight into the Genetic Population Structure of Wild Red Foxes in Poland Reveals Low Risk of Genetic Introgression from Escaped Farm Red Foxes
Source: MDPI journal article supplement (doi:10.3390/genes12050637), 2021-04-25
Supplement: s1 [file s1]

**Table S1.** The number and percentage of genotyped individuals.

| Locus     | Farm foxes (n=200)              |                             | Wild foxes SE (n=61)            |                             | Wild foxes SW (n=47)            |                             |
|-----------|---------------------------------|-----------------------------|---------------------------------|-----------------------------|---------------------------------|-----------------------------|
|           | Number of genotyped individuals | % of successfully genotyped | Number of genotyped individuals | % of successfully genotyped | Number of genotyped individuals | % of successfully genotyped |
| AHT137    | 199                             | 99.50                       | 61                              | 100                         | 47                              | 100                         |
| FH2097    | 199                             | 99.50                       | 45                              | 73.77                       | 42                              | 89.36                       |
| FH2613    | 200                             | 100                         | 61                              | 100                         | 47                              | 100                         |
| FH2980    | 199                             | 99.50                       | 60                              | 98.36                       | 46                              | 97.87                       |
| REN135K06 | 199                             | 99.50                       | 58                              | 95.08                       | 47                              | 100                         |
| REN248F14 | 199                             | 99.50                       | 60                              | 98.36                       | 47                              | 100                         |
| REN258F18 | 199                             | 99.50                       | 58                              | 95.08                       | 47                              | 100                         |
| REN64E19  | 179                             | 89.50                       | 61                              | 100                         | 47                              | 100                         |
| REN88H03  | 200                             | 100                         | 58                              | 95.08                       | 47                              | 100                         |
| UOR4101   | 199                             | 99.50                       | 59                              | 96.72                       | 47                              | 100                         |
| ZUBECA6   | 200                             | 100                         | 60                              | 98.36                       | 46                              | 97.87                       |
| FH3241    | 194                             | 97.00                       | 59                              | 96.72                       | 47                              | 100                         |
| FH3287    | 198                             | 99.00                       | 53                              | 86.88                       | 40                              | 85.11                       |
| FH3713    | 199                             | 99.50                       | 60                              | 98.36                       | 47                              | 100                         |
| FH3771    | 169                             | 84.50                       | 55                              | 90.16                       | 42                              | 89.36                       |
| FH3775    | 188                             | 94.00                       | 60                              | 98.36                       | 46                              | 97.87                       |
| FH3824    | 200                             | 100                         | 61                              | 100                         | 47                              | 100                         |
| FH3970    | 163                             | 81.50                       | 40                              | 65.57                       | 28                              | 59.57                       |
| FH4001    | 0                               | 0                           | 59                              | 96.72                       | 46                              | 97.87                       |
| REN210I14 | 198                             | 99.00                       | 36                              | 59.02                       | 29                              | 61.70                       |
| REN25E18  | 199                             | 99.50                       | 61                              | 100                         | 47                              | 100                         |
| REN307J23 | 197                             | 98.50                       | 56                              | 91.8                        | 46                              | 97.87                       |
| REN75M10  | 192                             | 96.00                       | 51                              | 83.61                       | 44                              | 93.62                       |
| FH2295    | 0                               | 0                           | 43                              | 70.49                       | 39                              | 82.98                       |

**Table S2.** Parameters of genetic diversity estimated for the studied farm and wild red foxes.

| LOCUS     | NoA               |            |            | A <sub>R</sub> |            |            | H <sub>o</sub> |            |            | H <sub>E</sub> |            |            | F <sub>IS</sub> |            |            |
|-----------|-------------------|------------|------------|----------------|------------|------------|----------------|------------|------------|----------------|------------|------------|-----------------|------------|------------|
|           | FARM              | WILD<br>SW | WILD<br>SE | FARM           | WILD<br>SW | WILD<br>SE | FARM           | WILD<br>SW | WILD<br>SE | FARM           | WILD<br>SW | WILD<br>SE | FARM            | WILD<br>SW | WILD<br>SE |
| AHT137    | 3                 | 9          | 11         | 3.00           | 8.02       | 8.59       | 0.67           | 0.77       | 0.72       | 0.60           | 0.80       | 0.78       | -0.12*          | 0.04       | 0.08       |
| FH2097    | 9                 | 13         | 16         | 8.35           | 12.27      | 13.87      | 0.71           | 0.83       | 0.73       | 0.68           | 0.90       | 0.90       | -0.05           | 0.08       | 0.18*      |
| FH2613    | 8                 | 10         | 11         | 4.72           | 8.51       | 9.14       | 0.24           | 0.45       | 0.67       | 0.26           | 0.55       | 0.69       | 0.08            | 0.18       | 0.02       |
| FH2980    | 7                 | 18         | 20         | 6.00           | 16.66      | 17.38      | 0.72           | 0.89       | 0.85       | 0.76           | 0.93       | 0.94       | 0.04            | 0.04       | 0.09       |
| FH3241    | 4                 | 12         | 11         | 3.98           | 10.56      | 9.26       | 0.49           | 0.81       | 0.81       | 0.51           | 0.81       | 0.80       | 0.03            | 0.00       | -0.01      |
| FH3287    | 2                 | 5          | 5          | 2.00           | 4.97       | 4.78       | 0.38           | 0.75       | 0.66       | 0.38           | 0.66       | 0.67       | 0.00            | -0.13      | 0.02       |
| FH3713    | 5                 | 28         | 27         | 3.73           | 21.47      | 19.41      | 0.61           | 0.89       | 0.93       | 0.60           | 0.92       | 0.91       | -0.02           | 0.03       | -0.02      |
| FH3771    | 10                | 21         | 23         | 6.85           | 18.70      | 18.99      | 0.69           | 0.83       | 0.96       | 0.69           | 0.93       | 0.93       | 0.00            | 0.11       | -0.03      |
| FH3775    | 3                 | 4          | 3          | 3.00           | 3.60       | 2.72       | 0.44           | 0.61       | 0.38       | 0.42           | 0.51       | 0.49       | -0.05           | -0.19      | 0.21       |
| FH3824    | 10                | 36         | 36         | 7.42           | 29.11      | 26.50      | 0.77           | 0.98       | 0.85       | 0.76           | 0.97       | 0.96       | -0.01           | -0.01      | 0.12*      |
| FH3970    | 6                 | 13         | 14         | 5.45           | 13.00      | 13.02      | 0.66           | 0.68       | 0.83       | 0.68           | 0.89       | 0.88       | 0.03            | 0.24*      | 0.07       |
| FH4001    | nPCR <sup>a</sup> | 43         | 41         | nPCR           | 33.00      | 28.30      | nPCR           | 0.89       | 0.92       | nPCR           | 0.98       | 0.96       | nPCR            | 0.09       | 0.04       |
| FH2295    | nPCR              | 4          | 5          | nPCR           | 3.64       | 4.61       | nPCR           | 0.31       | 0.47       | nPCR           | 0.33       | 0.44       | nPCR            | 0.06       | -0.06      |
| REN210I14 | 4                 | 7          | 6          | 3.44           | 6.97       | 5.95       | 0.19           | 0.72       | 0.81       | 0.40           | 0.76       | 0.74       | 0.53*           | 0.05       | -0.09      |
| REN25E18  | 1                 | 2          | 2          | 1.00           | 2.00       | 2.00       | 0.00           | 0.21       | 0.31       | 0.00           | 0.23       | 0.26       | -               | 0.06       | -0.18*     |
| REN307J23 | 3                 | 12         | 12         | 3.00           | 11.32      | 10.37      | 0.39           | 0.74       | 0.68       | 0.42           | 0.85       | 0.85       | 0.08            | 0.13       | 0.21*      |

|           |      |       |       |      |       |       |      |      |      |      |      |      |       |       |       |
|-----------|------|-------|-------|------|-------|-------|------|------|------|------|------|------|-------|-------|-------|
| REN75M10  | 9    | 10    | 12    | 5.43 | 8.91  | 10.87 | 0.70 | 0.66 | 0.76 | 0.74 | 0.86 | 0.88 | 0.05  | 0.23* | 0.13  |
| REN135K06 | 5    | 7     | 7     | 4.83 | 6.46  | 6.71  | 0.69 | 0.66 | 0.69 | 0.67 | 0.66 | 0.74 | -0.02 | 0.00  | 0.07  |
| REN248F14 | 1    | 1     | 1     | 1.00 | 1.00  | 1.00  | 0.00 | 0.00 | 0.00 | 0.00 | 0.00 | 0.00 | -     | -     | -     |
| REN258F18 | 5    | 14    | 14    | 4.75 | 12.86 | 12.92 | 0.71 | 0.81 | 0.69 | 0.71 | 0.87 | 0.86 | -0.02 | 0.07  | 0.20* |
| REN64E19  | 3    | 7     | 9     | 2.96 | 6.92  | 8.14  | 0.23 | 0.64 | 0.80 | 0.25 | 0.80 | 0.83 | 0.05  | 0.20* | 0.03  |
| REN88H03  | 2    | 2     | 3     | 2.00 | 2.00  | 2.98  | 0.38 | 0.30 | 0.19 | 0.44 | 0.31 | 0.24 | 0.14  | 0.05  | 0.20  |
| UOR4101   | 1    | 3     | 2     | 1.00 | 2.83  | 2.00  | 0.00 | 0.32 | 0.17 | 0.00 | 0.35 | 0.21 | -     | 0.08  | 0.20  |
| ZUBECA6   | 12   | 39    | 42    | 8.84 | 31.85 | 30.73 | 0.69 | 0.83 | 0.85 | 0.70 | 0.98 | 0.98 | 0.01  | 0.16* | 0.13* |
| OVERALL   | 5.14 | 13.33 | 13.87 | 4.22 | 11.53 | 11.26 | 0.47 | 0.65 | 0.66 | 0.48 | 0.70 | 0.71 | 0.18* | 0.08* | 0.07* |

NoA – number of alleles,  $A_R$  – allelic richness,  $H_o$  – observed heterozygosity,  $H_e$  – expected heterozygosity,  $F_{IS}$  – inbreeding coefficient, FARM – farm foxes, WILD SW – wild foxes from south-western Poland, WILD SE – wild foxes from south-eastern Poland

\* Statistically significant at  $P < 0.05$

<sup>a</sup> no PCR product

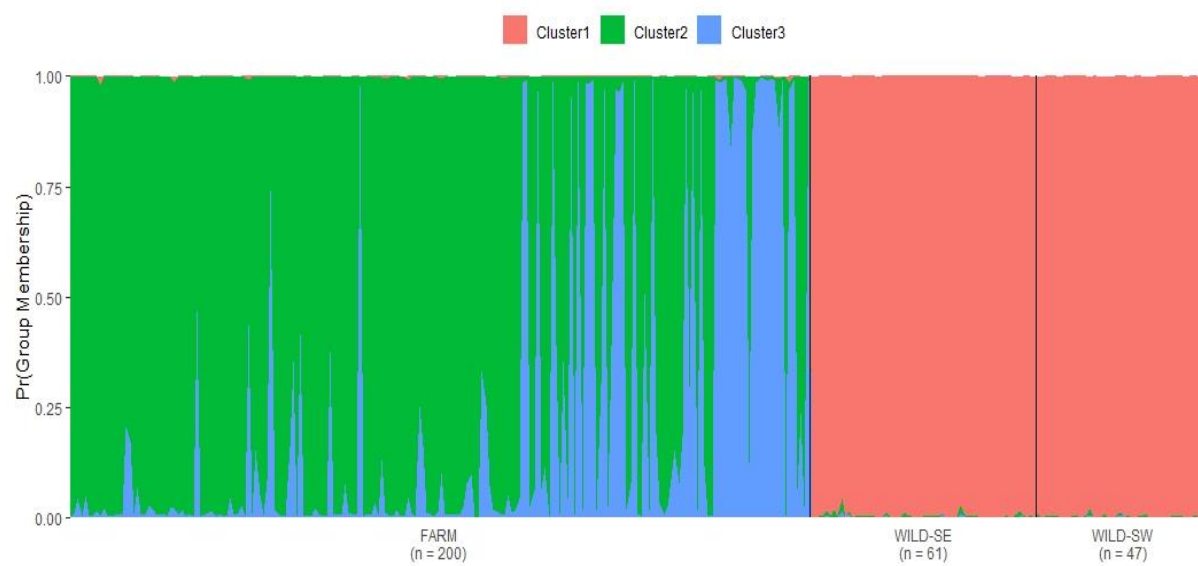

**Figure S1.** Bar plot produced for  $K = 3$  inferred by the Structure package [54,55].

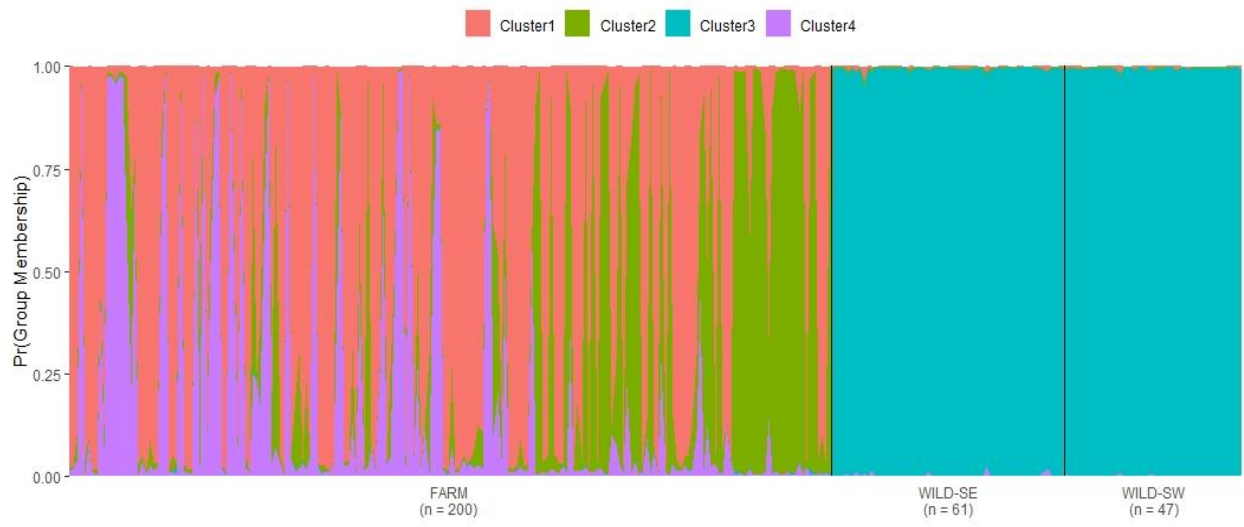

**Figure S2.** Bar plot produced for  $K = 4$  inferred by the Structure package [54,55].

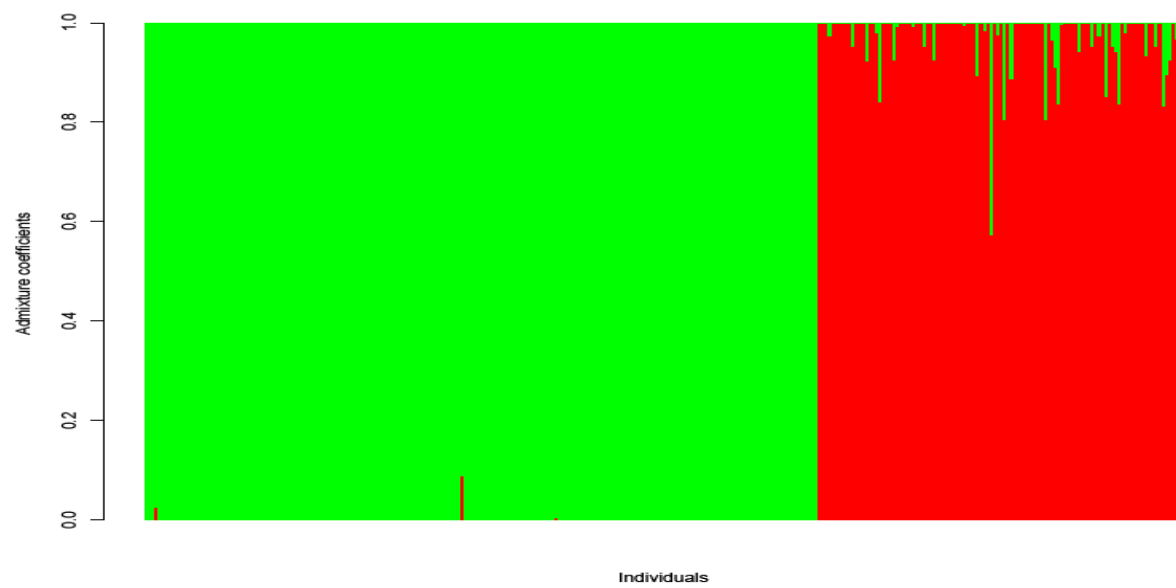

**Figure S3.** Bar plot showing probability of assignment for individual farm (FARM, green colour) and wild (WILS-SW+WILD-SE, red colour) red foxes at the most highly supported value of genetic clusters ( $K = 2$ ), inferred by the LEA package [58].

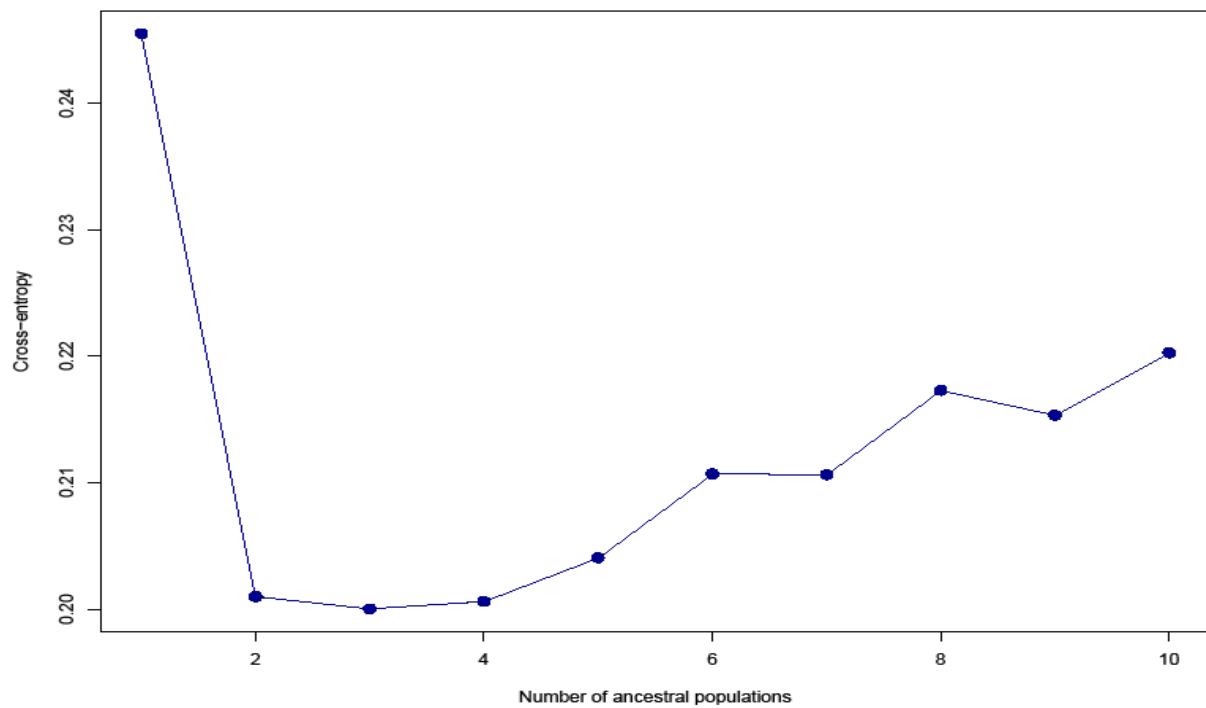

**Figure S4.** The cross-entropy criterion used in the LEA package [58] at the most highly supported value of putative genetic clusters,  $K = 2$ . The cross-entropy criterion is a value based on the prediction of masked genotypes to evaluate the error of ancestry estimation. The cross-entropy criterion helps to choose the best number of ancestral population ( $K$ ). A smaller value of cross-entropy means a better run in terms of prediction capacity.

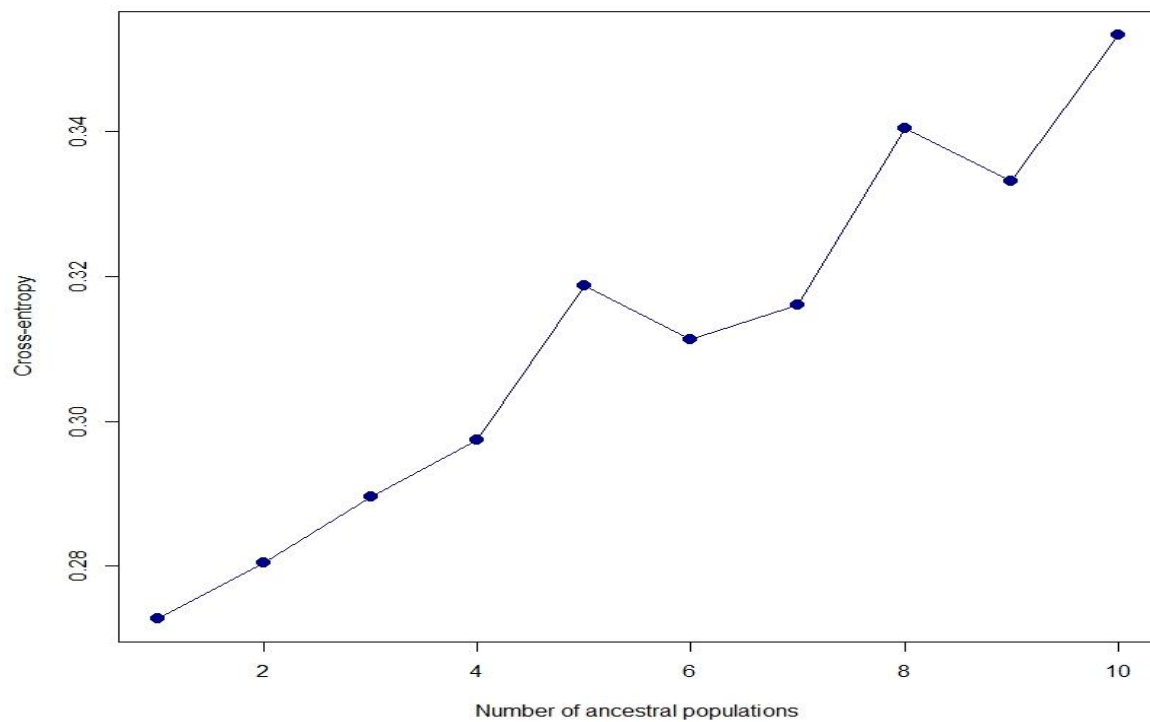

**Figure S5.** The cross-entropy criterion used in the LEA package [58] at the most highly supported value of putative genetic clusters,  $K = 1$ . The cross-entropy criterion is a value based on the prediction of masked genotypes to evaluate the error of ancestry estimation. The cross-entropy criterion helps to choose the best number of ancestral population ( $K$ ). A smaller value of cross-entropy means a better run in terms of prediction capacity.



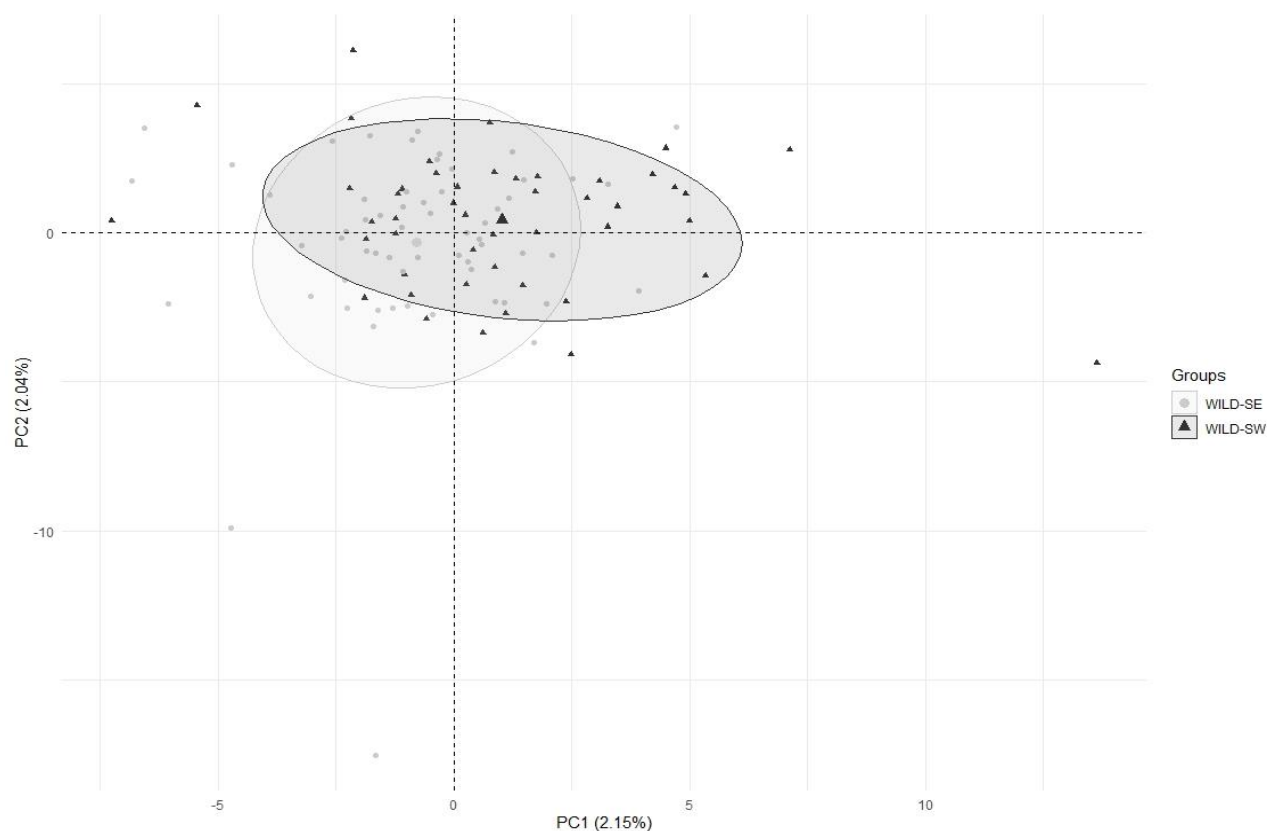

**Figure S6.** Principal component analysis (PCA) showing the genetic differentiation of WILD-SW and WILD-SE in Poland. The first two components (PC1 and PC2) accounting for 4.19% of the total variance (2.15% and 2.04%, respectively) were retained for the analysis. The scatter plot of the first two principal components displayed in a two-dimensional space shows no genetic separation between WILD-SW and WILD-SE (both sub-populations form one genetic cluster). The analysis was performed with the *ade4* package in R [60].
